# Supplementary material
Source: publisher figshare collection journal article supplement (https://acs.figshare.com/ndownloader/files/5335630)
Supplement: Supplementary file 1 [file 5335630]

 
data_rrcdhx1a
 
_audit_creation_method            SHELXL-97
_chemical_name_systematic
;
 ?
;
_chemical_name_common             ?
_chemical_melting_point           ?
_chemical_formula_moiety          ?
_chemical_formula_sum
 'C74 H48 Cd2 N12 P2'
_chemical_formula_weight          1391.98
 
loop_
 _atom_type_symbol
 _atom_type_description
 _atom_type_scat_dispersion_real
 _atom_type_scat_dispersion_imag
 _atom_type_scat_source
 'C'  'C'   0.0033   0.0016
 'International Tables Vol C Tables 4.2.6.8 and 6.1.1.4'
 'H'  'H'   0.0000   0.0000
 'International Tables Vol C Tables 4.2.6.8 and 6.1.1.4'
 'N'  'N'   0.0061   0.0033
 'International Tables Vol C Tables 4.2.6.8 and 6.1.1.4'
 'P'  'P'   0.1023   0.0942
 'International Tables Vol C Tables 4.2.6.8 and 6.1.1.4'
 'Cd'  'Cd'  -0.8075   1.2024
 'International Tables Vol C Tables 4.2.6.8 and 6.1.1.4'
 
_symmetry_cell_setting            'Trigonal'
_symmetry_space_group_name_H-M    'R-3'
 
loop_
 _symmetry_equiv_pos_as_xyz
 'x, y, z'
 '-y, x-y, z'
 '-x+y, -x, z'
 'x+2/3, y+1/3, z+1/3'
 '-y+2/3, x-y+1/3, z+1/3'
 '-x+y+2/3, -x+1/3, z+1/3'
 'x+1/3, y+2/3, z+2/3'
 '-y+1/3, x-y+2/3, z+2/3'
 '-x+y+1/3, -x+2/3, z+2/3'
 '-x, -y, -z'
 'y, -x+y, -z'
 'x-y, x, -z'
 '-x+2/3, -y+1/3, -z+1/3'
 'y+2/3, -x+y+1/3, -z+1/3'
 'x-y+2/3, x+1/3, -z+1/3'
 '-x+1/3, -y+2/3, -z+2/3'
 'y+1/3, -x+y+2/3, -z+2/3'
 'x-y+1/3, x+2/3, -z+2/3'
 
_cell_length_a                    12.6751(6)
_cell_length_b                    12.6751(6)
_cell_length_c                    32.243(3)
_cell_angle_alpha                 90.00
_cell_angle_beta                  90.00
_cell_angle_gamma                 120.00
_cell_volume                      4486.1(5)
_cell_formula_units_Z             3
_cell_measurement_temperature     130(1)
_cell_measurement_reflns_used     3828
_cell_measurement_theta_min       2.24
_cell_measurement_theta_max       27.5
 
_exptl_crystal_description        'hexagonal prism'
_exptl_crystal_colour             'yellow'
_exptl_crystal_size_max           0.22
_exptl_crystal_size_mid           0.22
_exptl_crystal_size_min           0.075
_exptl_crystal_density_meas       ?
_exptl_crystal_density_diffrn     1.546
_exptl_crystal_density_method     'not measured'
_exptl_crystal_F_000              2106
_exptl_absorpt_coefficient_mu     0.822
_exptl_absorpt_correction_type    'Multi-scan'
_exptl_absorpt_correction_T_min   0.836
_exptl_absorpt_correction_T_max   0.940
_exptl_absorpt_process_details    
;
 SADABS, Area-Detector absorption correction, Siemens Industrial
 Automation Inc., Madison, WI, USA, 1996.
; 
 
_exptl_special_details
;
 ?
;
 
_diffrn_ambient_temperature       130(2)
_diffrn_radiation_wavelength      0.71073
_diffrn_radiation_type            MoK\a
_diffrn_radiation_source          'fine-focus sealed tube'
_diffrn_radiation_monochromator   graphite
_diffrn_measurement_device_type   'Bruker CCD area detector'
_diffrn_measurement_method        'phi and omega scans'
_diffrn_detector_area_resol_mean  ?
_diffrn_standards_number          ?
_diffrn_standards_interval_count  ?
_diffrn_standards_interval_time   ?
_diffrn_standards_decay_%         ?
_diffrn_reflns_number             9516
_diffrn_reflns_av_R_equivalents   0.0275
_diffrn_reflns_av_sigmaI/netI     0.0256
_diffrn_reflns_limit_h_min        -16
_diffrn_reflns_limit_h_max        16
_diffrn_reflns_limit_k_min        -16
_diffrn_reflns_limit_k_max        15
_diffrn_reflns_limit_l_min        -29
_diffrn_reflns_limit_l_max        41
_diffrn_reflns_theta_min          1.89
_diffrn_reflns_theta_max          27.50
_reflns_number_total              2294
_reflns_number_gt                 2015
_reflns_threshold_expression      >2sigma(I)
 
_computing_data_collection        'Bruker SMART'
_computing_cell_refinement        'Bruker SMART'
_computing_data_reduction         'Bruker SAINT'
_computing_structure_solution     'Bruker SHELXTL'
_computing_structure_refinement   'SHELXL-97 (Sheldrick, 1997)'
_computing_molecular_graphics     ?
_computing_publication_material   ?
 
_refine_special_details
;
 Refinement of F^2^ against ALL reflections.  The weighted R-factor wR and
 goodness of fit S are based on F^2^, conventional R-factors R are based
 on F, with F set to zero for negative F^2^. The threshold expression of
 F^2^ > 2sigma(F^2^) is used only for calculating R-factors(gt) etc. and is
 not relevant to the choice of reflections for refinement.  R-factors based
 on F^2^ are statistically about twice as large as those based on F, and R-
 factors based on ALL data will be even larger.
;
 
_refine_ls_structure_factor_coef  Fsqd
_refine_ls_matrix_type            full
_refine_ls_weighting_scheme       calc
_refine_ls_weighting_details
 'calc w=1/[\s^2^(Fo^2^)+(0.0287P)^2^+17.0740P] where P=(Fo^2^+2Fc^2^)/3'
_atom_sites_solution_primary      direct
_atom_sites_solution_secondary    difmap
_atom_sites_solution_hydrogens    geom
_refine_ls_hydrogen_treatment     constr
_refine_ls_extinction_method      none
_refine_ls_extinction_coef        ?
_refine_ls_number_reflns          2294
_refine_ls_number_parameters      137
_refine_ls_number_restraints      0
_refine_ls_R_factor_all           0.0374
_refine_ls_R_factor_gt            0.0314
_refine_ls_wR_factor_ref          0.0767
_refine_ls_wR_factor_gt           0.0745
_refine_ls_goodness_of_fit_ref    1.102
_refine_ls_restrained_S_all       1.102
_refine_ls_shift/su_max           0.000
_refine_ls_shift/su_mean          0.000
 
loop_
 _atom_site_label
 _atom_site_type_symbol
 _atom_site_fract_x
 _atom_site_fract_y
 _atom_site_fract_z
 _atom_site_U_iso_or_equiv
 _atom_site_adp_type
 _atom_site_occupancy
 _atom_site_symmetry_multiplicity
 _atom_site_calc_flag
 _atom_site_refinement_flags
 _atom_site_disorder_assembly
 _atom_site_disorder_group
Cd1 Cd 0.3333 0.6667 0.1667 0.01476(11) Uani 1 6 d S . .
Cd2 Cd 0.0000 0.0000 0.0000 0.01641(11) Uani 1 6 d S . .
C5 C 0.0407(2) 0.2139(2) 0.07478(7) 0.0181(5) Uani 1 1 d . . .
C6 C 0.1390(2) 0.3912(2) 0.11938(7) 0.0185(5) Uani 1 1 d . . .
C2 C -0.0653(2) 0.2197(2) 0.13911(7) 0.0174(4) Uani 1 1 d . . .
N2 N 0.21585(19) 0.48808(18) 0.12814(6) 0.0212(4) Uani 1 1 d . . .
C1 C -0.1668(2) 0.1056(2) 0.13113(7) 0.0196(5) Uani 1 1 d . . .
H1 H -0.1682 0.0626 0.1068 0.024 Uiso 1 1 calc R . .
C3 C -0.0676(2) 0.2797(2) 0.17540(7) 0.0197(5) Uani 1 1 d . . .
H3 H -0.0001 0.3575 0.1817 0.024 Uiso 1 1 calc R . .
C4 C 0.0400(2) 0.2752(2) 0.11090(7) 0.0183(5) Uani 1 1 d . . .
N1 N 0.03591(19) 0.15919(18) 0.04544(6) 0.0219(4) Uani 1 1 d . . .
P1 P 0.6667 0.3333 0.08842(3) 0.0221(2) Uani 1 3 d S . .
C12 C 0.5455(2) 0.3544(2) 0.06993(8) 0.0246(5) Uani 1 1 d . . .
C8 C 0.5334(2) 0.4503(2) 0.08535(9) 0.0297(6) Uani 1 1 d . . .
H8 H 0.5894 0.5039 0.1054 0.036 Uiso 1 1 calc R . .
C11 C 0.6667 0.3333 0.14377(14) 0.0282(10) Uani 1 3 d S . .
H11A H 0.6780 0.4112 0.1539 0.042 Uiso 0.33 1 calc PR . .
H11B H 0.7332 0.3220 0.1539 0.042 Uiso 0.33 1 calc PR . .
H11C H 0.5888 0.2668 0.1539 0.042 Uiso 0.33 1 calc PR . .
C7 C 0.3685(3) 0.2930(3) 0.02772(9) 0.0413(7) Uani 1 1 d . . .
H7 H 0.3108 0.2384 0.0082 0.050 Uiso 1 1 calc R . .
C13 C 0.4619(3) 0.2751(3) 0.04106(9) 0.0356(7) Uani 1 1 d . . .
H13 H 0.4691 0.2090 0.0306 0.043 Uiso 1 1 calc R . .
C10 C 0.3586(3) 0.3893(3) 0.04254(9) 0.0336(6) Uani 1 1 d . . .
H10 H 0.2951 0.4019 0.0327 0.040 Uiso 1 1 calc R . .
C9 C 0.4398(3) 0.4675(3) 0.07142(9) 0.0332(6) Uani 1 1 d . . .
H9 H 0.4317 0.5333 0.0818 0.040 Uiso 1 1 calc R . .
 
loop_
 _atom_site_aniso_label
 _atom_site_aniso_U_11
 _atom_site_aniso_U_22
 _atom_site_aniso_U_33
 _atom_site_aniso_U_23
 _atom_site_aniso_U_13
 _atom_site_aniso_U_12
Cd1 0.01260(14) 0.01260(14) 0.0191(2) 0.000 0.000 0.00630(7)
Cd2 0.01739(14) 0.01739(14) 0.0144(2) 0.000 0.000 0.00869(7)
C5 0.0152(11) 0.0155(11) 0.0224(12) 0.0031(9) -0.0001(9) 0.0069(9)
C6 0.0200(11) 0.0223(12) 0.0174(11) 0.0002(9) 0.0014(9) 0.0138(10)
C2 0.0195(11) 0.0152(11) 0.0186(11) 0.0007(8) -0.0011(9) 0.0095(9)
N2 0.0187(10) 0.0191(10) 0.0241(10) -0.0029(8) 0.0005(8) 0.0081(9)
C1 0.0236(12) 0.0160(11) 0.0185(11) -0.0035(8) -0.0022(9) 0.0093(10)
C3 0.0207(11) 0.0148(11) 0.0201(11) -0.0023(9) -0.0024(9) 0.0061(9)
C4 0.0176(11) 0.0161(11) 0.0194(11) -0.0021(8) -0.0009(9) 0.0070(9)
N1 0.0235(11) 0.0179(10) 0.0210(10) 0.0000(8) 0.0032(8) 0.0079(9)
P1 0.0204(3) 0.0204(3) 0.0256(6) 0.000 0.000 0.01021(16)
C12 0.0201(12) 0.0249(13) 0.0282(13) -0.0021(10) -0.0026(10) 0.0108(10)
C8 0.0242(13) 0.0238(13) 0.0389(15) -0.0057(11) -0.0066(11) 0.0104(11)
C11 0.0279(15) 0.0279(15) 0.029(2) 0.000 0.000 0.0139(7)
C7 0.0373(17) 0.0483(19) 0.0344(16) -0.0127(14) -0.0175(13) 0.0184(15)
C13 0.0403(16) 0.0365(16) 0.0335(15) -0.0136(12) -0.0105(12) 0.0218(14)
C10 0.0264(14) 0.0394(16) 0.0350(15) 0.0044(12) -0.0045(11) 0.0164(13)
C9 0.0291(14) 0.0285(14) 0.0452(17) -0.0003(12) -0.0013(12) 0.0168(12)
 
_geom_special_details
;
 All esds (except the esd in the dihedral angle between two l.s. planes)
 are estimated using the full covariance matrix.  The cell esds are taken
 into account individually in the estimation of esds in distances, angles
 and torsion angles; correlations between esds in cell parameters are only
 used when they are defined by crystal symmetry.  An approximate (isotropic)
 treatment of cell esds is used for estimating esds involving l.s. planes.
;
 
loop_
 _geom_bond_atom_site_label_1
 _geom_bond_atom_site_label_2
 _geom_bond_distance
 _geom_bond_site_symmetry_2
 _geom_bond_publ_flag
Cd1 N2 2.348(2) 15 ?
Cd1 N2 2.348(2) 3_565 ?
Cd1 N2 2.348(2) . ?
Cd1 N2 2.348(2) 2_665 ?
Cd1 N2 2.348(2) 13_565 ?
Cd1 N2 2.348(2) 14_455 ?
Cd2 N1 2.347(2) 10 ?
Cd2 N1 2.347(2) . ?
Cd2 N1 2.347(2) 12 ?
Cd2 N1 2.347(2) 3 ?
Cd2 N1 2.347(2) 2 ?
Cd2 N1 2.347(2) 11 ?
C5 N1 1.156(3) . ?
C5 C4 1.403(3) . ?
C6 N2 1.157(3) . ?
C6 C4 1.402(3) . ?
C2 C1 1.398(3) . ?
C2 C3 1.404(3) . ?
C2 C4 1.471(3) . ?
C1 C3 1.387(3) 13_455 ?
C3 C1 1.387(3) 13_455 ?
P1 C11 1.785(5) . ?
P1 C12 1.787(3) 2_655 ?
P1 C12 1.787(3) 3_665 ?
P1 C12 1.787(3) . ?
C12 C13 1.391(4) . ?
C12 C8 1.391(4) . ?
C8 C9 1.384(4) . ?
C7 C10 1.374(4) . ?
C7 C13 1.381(4) . ?
C10 C9 1.375(4) . ?
 
loop_
 _geom_angle_atom_site_label_1
 _geom_angle_atom_site_label_2
 _geom_angle_atom_site_label_3
 _geom_angle
 _geom_angle_site_symmetry_1
 _geom_angle_site_symmetry_3
 _geom_angle_publ_flag
N2 Cd1 N2 180.0 15 3_565 ?
N2 Cd1 N2 85.40(7) 15 . ?
N2 Cd1 N2 94.60(7) 3_565 . ?
N2 Cd1 N2 85.40(7) 15 2_665 ?
N2 Cd1 N2 94.60(7) 3_565 2_665 ?
N2 Cd1 N2 94.60(7) . 2_665 ?
N2 Cd1 N2 94.60(7) 15 13_565 ?
N2 Cd1 N2 85.40(7) 3_565 13_565 ?
N2 Cd1 N2 180.0 . 13_565 ?
N2 Cd1 N2 85.40(7) 2_665 13_565 ?
N2 Cd1 N2 94.60(7) 15 14_455 ?
N2 Cd1 N2 85.40(7) 3_565 14_455 ?
N2 Cd1 N2 85.40(7) . 14_455 ?
N2 Cd1 N2 180.0 2_665 14_455 ?
N2 Cd1 N2 94.60(7) 13_565 14_455 ?
N1 Cd2 N1 180.00(13) 10 . ?
N1 Cd2 N1 85.15(7) 10 12 ?
N1 Cd2 N1 94.85(7) . 12 ?
N1 Cd2 N1 94.85(7) 10 3 ?
N1 Cd2 N1 85.15(7) . 3 ?
N1 Cd2 N1 180.00(12) 12 3 ?
N1 Cd2 N1 94.85(7) 10 2 ?
N1 Cd2 N1 85.15(7) . 2 ?
N1 Cd2 N1 94.85(7) 12 2 ?
N1 Cd2 N1 85.15(7) 3 2 ?
N1 Cd2 N1 85.15(7) 10 11 ?
N1 Cd2 N1 94.85(7) . 11 ?
N1 Cd2 N1 85.15(7) 12 11 ?
N1 Cd2 N1 94.85(7) 3 11 ?
N1 Cd2 N1 180.0(2) 2 11 ?
N1 C5 C4 176.8(3) . . ?
N2 C6 C4 175.5(3) . . ?
C1 C2 C3 117.1(2) . . ?
C1 C2 C4 121.8(2) . . ?
C3 C2 C4 121.1(2) . . ?
C6 N2 Cd1 160.60(19) . . ?
C3 C1 C2 121.5(2) 13_455 . ?
C1 C3 C2 121.4(2) 13_455 . ?
C6 C4 C5 119.5(2) . . ?
C6 C4 C2 120.2(2) . . ?
C5 C4 C2 120.3(2) . . ?
C5 N1 Cd2 162.89(19) . . ?
C11 P1 C12 109.48(9) . 2_655 ?
C11 P1 C12 109.48(9) . 3_665 ?
C12 P1 C12 109.46(9) 2_655 3_665 ?
C11 P1 C12 109.48(9) . . ?
C12 P1 C12 109.46(9) 2_655 . ?
C12 P1 C12 109.46(9) 3_665 . ?
C13 C12 C8 119.6(2) . . ?
C13 C12 P1 121.1(2) . . ?
C8 C12 P1 119.3(2) . . ?
C9 C8 C12 120.0(3) . . ?
C10 C7 C13 120.3(3) . . ?
C7 C13 C12 119.7(3) . . ?
C7 C10 C9 120.6(3) . . ?
C10 C9 C8 119.8(3) . . ?
 
_diffrn_measured_fraction_theta_max    0.994
_diffrn_reflns_theta_full              27.50
_diffrn_measured_fraction_theta_full   0.994
_refine_diff_density_max    0.673
_refine_diff_density_min   -0.771
_refine_diff_density_rms    0.081
